# Supplementary material
Source: PubMed Central journal article supplement (PMC5347611)
Supplement: pnas.1616392114.sapp.pdf [file pnas.1616392114.sapp.pdf]

## Supporting Information

### Supporting methods

***Estimating ancestry components in Admixture and Structure:*** Estimated individual ancestry from supervised and unsupervised clustering in *Admixture* are highly concordant for the autosomes for both migration events, and for the X chromosome for the Neolithic migration scenario. For X-chromosomal ancestry estimated for the steppe migration, however, reference individuals do not emerge as clusters in unsupervised *Admixture*, therefore results cannot be used in this framework. For both the X chromosome and autosomes, unsupervised *Structure* estimates are similar to those from *Admixture*. Perhaps surprisingly, supervised *Structure* produces different estimates for both individual and population-level ancestry estimates; however, as we show below, this deviation is likely an effect of a small sample size, as increasing the sample size for supervised *Structure* leads to results similar to *Admixture* and unsupervised *Structure* for an example case with high coverage data. In all *Structure* analyses, we use 10,000 burn-in iterations, followed by 50,000 iterations.

As our inference methods rely on the mean ancestry in the population (and are supported by the variance), we focus on comparisons of these summary statistics. The population mean and variance of ancestry for supervised *Structure*, supervised and unsupervised *Admixture* are highly concordant (no data for BA X chromosome in unsupervised *Admixture*). However, the mean ancestry estimated in supervised *Structure* is qualitatively different, and the variance is substantially lower. That is, downstream analyses using the first three methods would produce similar estimates of the levels of sex bias during the two migrations, while inference from supervised *Structure* would be qualitatively different, though notably, still in the same direction we observe for both migration events. Below, we investigated various factors, particularly sample size, that can cause the deviation in supervised *Structure* results by investigating HapMap data. We conclude that the differing finding using supervised *Structure* for the ancient individuals is due to sensitivity to low sample sizes for the supervised *Structure* algorithm and we use estimates from supervised *Admixture* for inference in the main text, and reiterate that inference using unsupervised *Structure* would be highly similar because of the similar mean and variance of ancestry estimated. Ancestry for each individual is presented as the average estimated individual ancestry using ten independent seeds, considering the X chromosome and autosomes separately.

***Comparing ancestry estimation methods using HapMap data:*** As three methods produce concordant results, with only supervised *Structure* differing, we investigated various factors, particularly sample size, that can cause the deviation in supervised *Structure* results. We investigated the effect of sample size by reproducing the analysis on a larger dataset from the HapMap Phase 3 Project (44). We considered the recent admixture between Africans and Europeans, using YRI and CEU as reference populations and estimating ancestry in ASW individuals (Fig. S5). To examine the impact of sample size on accuracy of ancestry inference, we down sampled the reference populations considering sample sizes ranging from 4 diploid individuals in each reference population to 112 (the maximum number of CEU individuals). The set of individuals in smaller reference panels are subsets of the larger panels.

For each sample size of reference populations, we estimated ancestry in 16 ASW individuals using each of the four methods (supervised and unsupervised settings in each *Admixture* and *Structure*), based on the sample size of BA. Figure S5 plots the mean and variance of ancestry in the ASW population for each sample size and method. Each point is based on 10 replicates, first averaging ancestry by individual. For computational speed, we estimated ancestry from 15,000 randomly drawn autosomal SNPs, after LD pruning using the same method as for the ancient DNA (see Genetic samples and populations). For each replicate, we resampled 15,000 SNPs and use a new seed. As in our data, supervised *Structure* is an outlier in its behavior. Indeed, as the ancient samples are largely haploid, the corresponding sample sizes most representative are in the range of four to ten diploid CEU/YRI individuals. Particularly in this range of the plot, the mean and variance of ancestry estimated using supervised *Structure* differ greatly from those using all other methods, and are further from corresponding estimates at large sample sizes under all methods (Fig. S5). As the sample sizes increase for the reference populations, the results from supervised *Structure* approach the results of the three other methods (Fig. S5). We conclude that the differing finding using supervised *Structure* for the ancient individuals is due to sensitivity to low sample sizes for the supervised *Structure* algorithm. Therefore, we use estimates from supervised *Admixture* for inference in the main text, and reiterate that inference using unsupervised *Structure* would be highly similar because of the similar mean and variance of ancestry estimated. Ancestry for each individual is presented as the average estimated individual ancestry using ten independent seeds, considering the X chromosome and autosomes separately.

***Simulations to estimate range of sex bias during Neolithic Transition:*** For a constant admixed population of size  $N$ , with  $N \in \{1,000; 5,000; 10,000\}$ , we simulated the ancestry proportion of individuals in the admixed population recursively for 40 generations, or approximately 1,000 years, assuming a single admixture event followed by no further migration (Fig. 1). For a generation time of  $\sim 25$  years, this number of generations approximately corresponds to the difference in time between the onset of migration and the radiocarbon ages of sampled admixed individuals for each migration (6).

We set the total contributions from each population based on their autosomal ancestry levels (17,35,36), with HG as 0.087, and AF to be 0.913. We define the level of sex bias as the ratio of male to female contributions from a given source population,  $B$ , considering  $B \in \{\frac{1}{40}, \dots, \frac{i}{40}, \dots, 1, \dots, \frac{40}{i}, \dots, \frac{40}{1}\}$ . Given the overall contribution from each source population, as well as a specified value of male to female contributions,  $B$ , the female and male contribution parameters can be exactly solved. That is, adapting eq. 1 from (35), for male contribution from population  $\alpha$  given by  $m_\alpha$ , the probability of a randomly chosen individual in the first generation of the admixed population having a male parent from each source population is  $m_{HG} = 2 * 0.087 \left(\frac{B}{B+1}\right)$ ,  $m_{AF} = 2 * 0.913 \left(\frac{B}{B+1}\right)$ . Similarly, the female contributions ( $f_\alpha$ ) can be written as:  $f_{HG} = 2 * 0.087 - m_{HG}$ ,  $f_{AF} = 2 * 0.913 - m_{AF}$ . Given the sex-specific contribution parameters, we then did 1,000 replicate simulations for different levels of specified sex bias.

***Simulating autosomal ancestry:*** For the first generation,  $g = 1$ , we randomly chose and matched  $2N$  parents, making  $N$  parental pairs. Each parent is drawn with probability given by their sex-specific contribution level. An individual's autosomal ancestry is calculated as the average of its parent's autosomal ancestries. Then, for  $g \geq 2$ , we calculated ancestry in  $N$

individuals at generation  $g$  by randomly choosing and pairing  $2N$  parents from the population in the previous generation,  $g - 1$ .

**Simulating X-chromosomal ancestry:** we followed the same procedure as for the autosomes, but instead considered separate populations of males and females, each with  $N/2$  individuals. For the female population, we generated  $N$  parental pairs by drawing an individual from each the male and female population from the previous generation. For the male population, we drew  $N/2$  mothers from the female population in the previous generation. Ancestry of females was calculated as the average of the parental ancestries, while ancestry for males is equal to the ancestry of the mother.

At  $g = 40$ , we randomly sampled 20 individuals, and calculated the mean autosomal ancestry and mean X-chromosomal ancestry in the sample. The mean X-chromosomal ancestry is calculated as a weighted mean of the female and male X-chromosomal ancestries, based on the proportion of females in the data set (75%). Figure 3A shows the values of sex bias,  $B$ , for which the observed X to autosomal ancestry ratio is within the middle 50% and 80% of ratios calculated from the 1,000 simulated populations with that level of specified sex bias.

The effect of drift on admixture fractions is larger in smaller populations (45); we therefore expect a larger possible range of sex bias values to produce values of X-to-autosomal ancestry ratios similar to those estimates from the data for smaller population sizes. Yet, even simulations with an admixed population size of 1,000 suggest less than 1.2 males migrating for every female from AF to CE.

### Supplemental references

44. International HapMap 3 Consortium, et al. (2010). Integrating common and rare genetic variation in diverse human populations. *Nature* 467, 52–58.
45. Long, J. C. (1991). The genetic structure of admixed populations. *Genetics*, 127(2), 417-428.

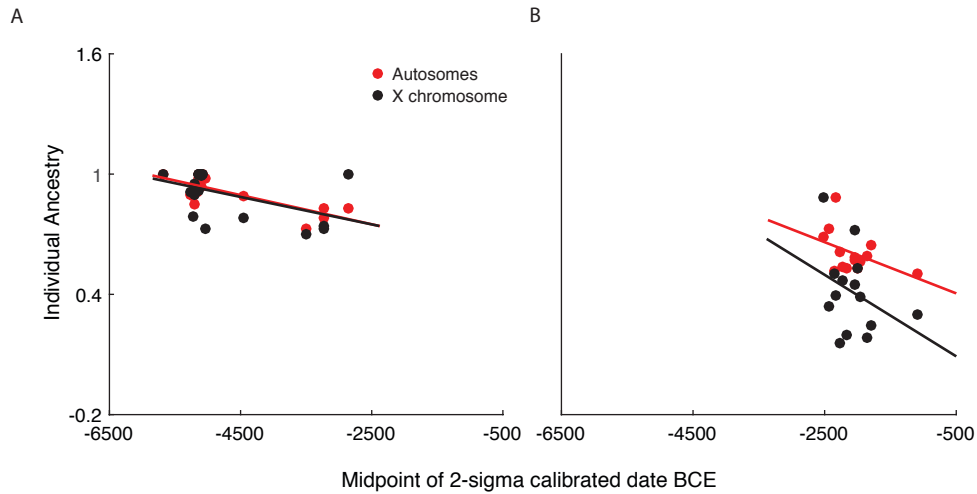

**Figure S1: Relationship between sampling age and ancestry.** The linear model shows a significant relationship between sampling age, measured as the midpoint of the 2-sigma range of calibrated dates BCE, and ancestry for (A) the Neolithic migration ( $p=0.02$  &  $R^2=0.21$ ,  $p<0.001$  &  $R^2=0.59$  for X and autosomes, respectively), but not for (B) the Pontic-Steppe migration ( $p=0.21$  &  $R^2=0.05$ ,  $p=0.11$  &  $R^2=0.13$  for X and autosomes, respectively). Ancestry is relative to the migrating population: AF for the Neolithic, and SP for the steppe.

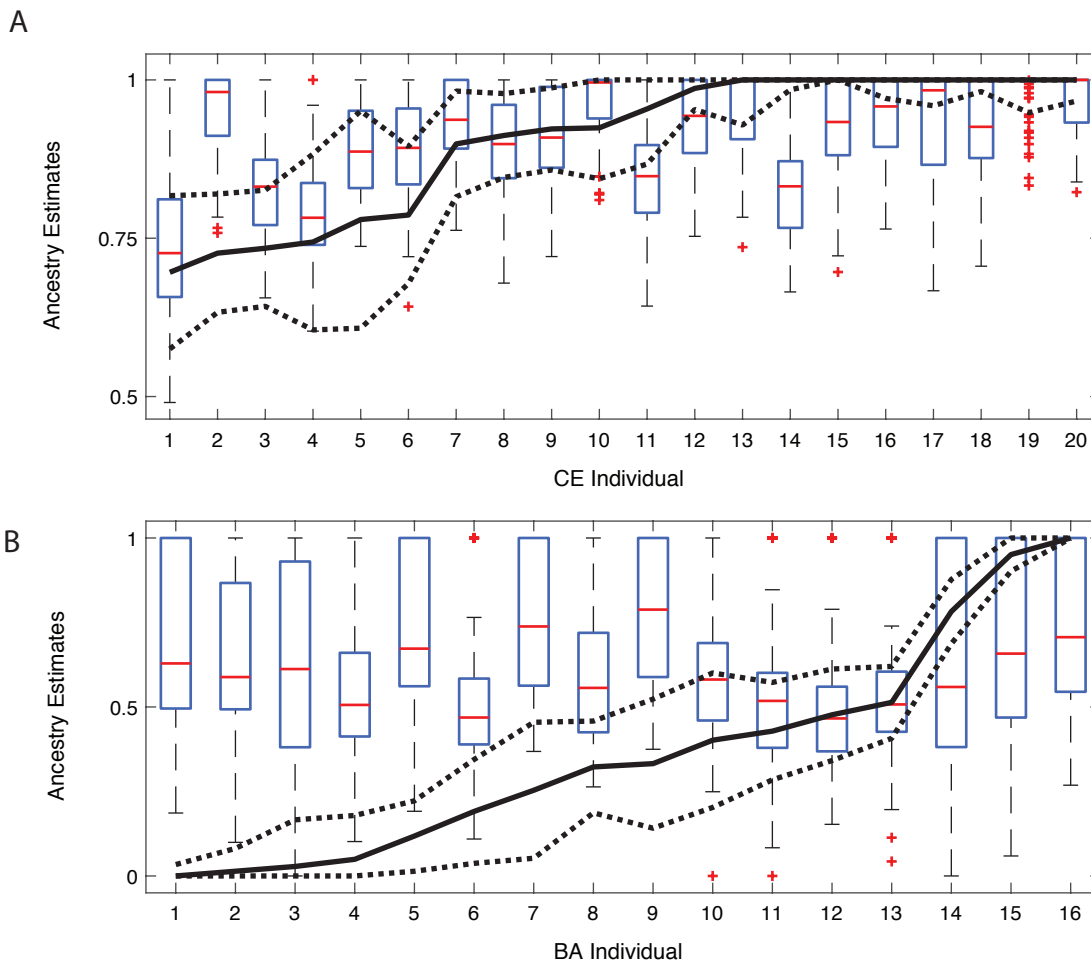

**Figure S2: Resampling SNPs to estimate autosomal ancestry.** Each boxplot represents the range of estimated autosomal ancestries over 100 resampled sets of randomly drawn autosomal SNPs to match the number of X-chromosomal SNPs. The lines correspond to estimated X-chromosomal ancestry by individual, with dotted lines marking within one standard error. (A) The Neolithic Transition. The number of SNPs is 3,763. The distribution of X and autosomal ancestry largely overlap in most individuals. (B) The Pontic Steppe migration. The number of SNPs is 4,605. Ancestry on the X is either lower or similar for all individuals. For both panels, individuals are presented in the same order as Fig. 2.

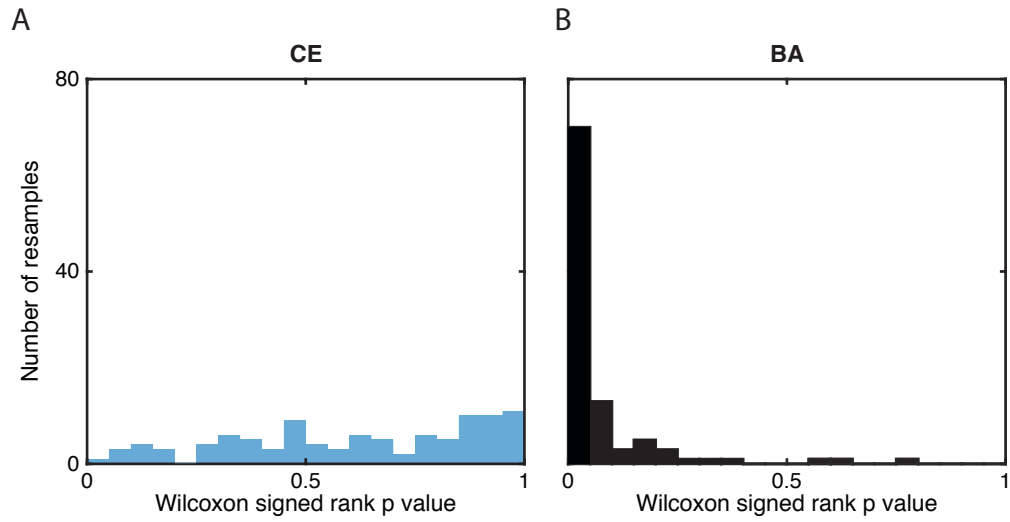

**Figure S3: Histogram of p values for the Wilcoxon sign-rank test.** In each admixed population, the comparison of the distribution of ancestry on the X chromosome to the 100 autosomal ancestry distributions for (A) the CE population, and (B) the BA population.

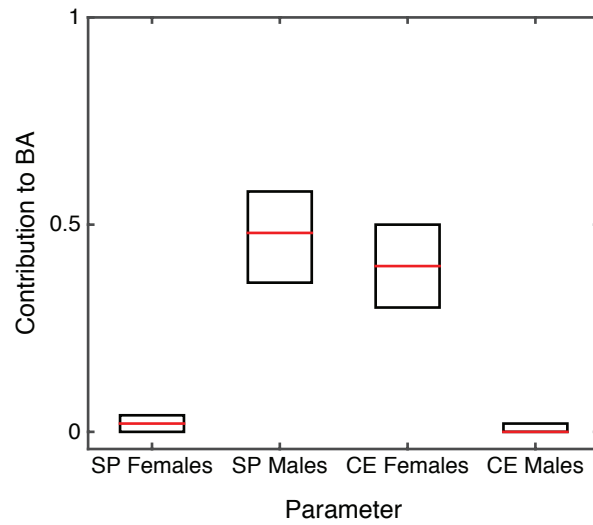

**Figure S4: Estimated sex-specific contributions from Pontic Steppe (SP) and early Central Europeans (CE) to LNBA Europeans (BA).** Under a model of constant contributions over time, each box represents the middle fifty percent of parameter sets for the smallest 0.1% of Euclidean distances between the model-predicted and observed X and autosomal ancestry from a grid of possible parameter values. Red line is the median of plotted values.

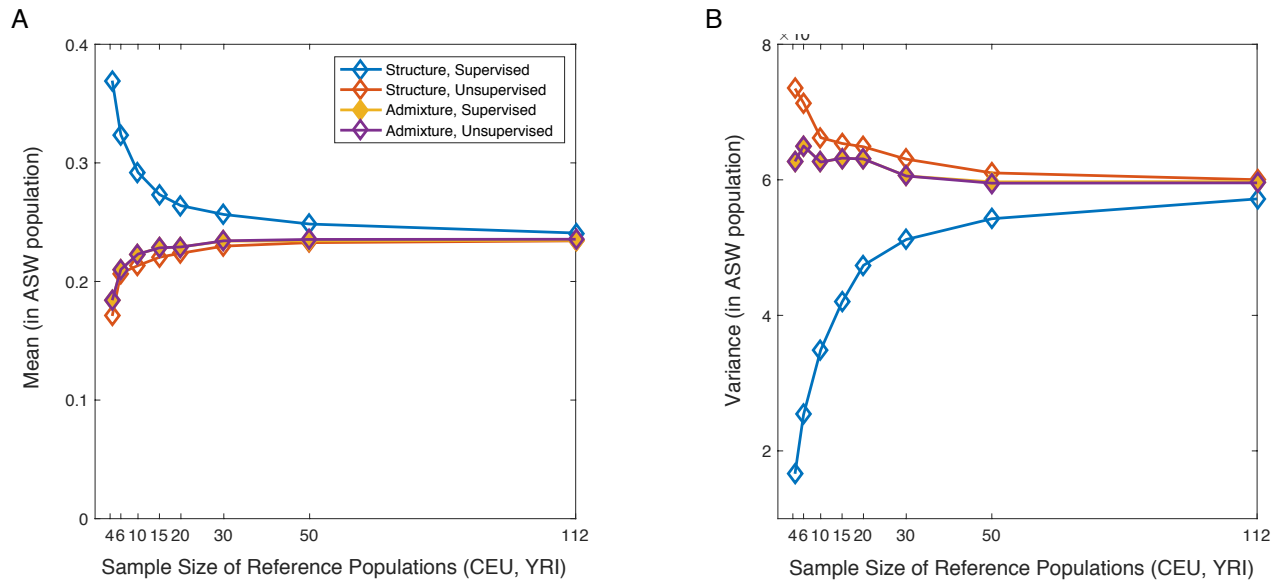

**Figure S5: Comparing ancestry estimation methods using HapMap data.** The (A) variance and (B) mean of CEU-related ancestry in the ASW (African American) population by sample size for four clustering methods. Each point is based on 10 replicates, first averaging ancestry by individual. For each replicate, we resample 15,000 SNPs and use a new seed. Supervised clustering in *Structure* produces qualitatively different results than the other methods for small sample sizes.



| Admixed Population    | Individual | Archeological Label    | # SNPs (X) | # SNPs (Autosomes) |
|-----------------------|------------|------------------------|------------|--------------------|
| CE                    | I0172      | Central_MN             | 3,348      | 296,827            |
| CE                    | I0560      | Central_MN             | 1,293      | 125,647            |
| CE                    | I1497      | Central_MN             | 2,945      | 282,608            |
| CE                    | I1495      | Hungary_EN             | 2,595      | 282,090            |
| CE                    | I1496      | Hungary_EN             | 2,504      | 277,979            |
| CE                    | I1498      | Hungary_EN             | 2,944      | 281,643            |
| CE                    | I1499      | Hungary_EN             | 2,979      | 282,181            |
| CE                    | I1500      | Hungary_EN             | 2,540      | 282,155            |
| CE                    | I1505      | Hungary_EN             | 2,835      | 271,675            |
| CE                    | I1506      | Hungary_EN             | 2,553      | 250,572            |
| CE                    | I1508      | Hungary_EN             | 2,118      | 202,813            |
| CE                    | Iceman     | Iceman (MN)            | 3,563      | 329,264            |
| CE                    | I0022      | LBK_EN                 | 1,226      | 127,899            |
| CE                    | I0025      | LBK_EN                 | 2,838      | 276,166            |
| CE                    | I0026      | LBK_EN                 | 3,002      | 287,954            |
| CE                    | I0046      | LBK_EN                 | 3,008      | 281,010            |
| CE                    | I0054      | LBK_EN                 | 3,269      | 305,318            |
| CE                    | I0100      | LBK_EN                 | 3,159      | 309,476            |
| CE                    | I0659      | LBK_EN                 | 1,186      | 181,302            |
| CE                    | I1550      | LBK_EN                 | 1,827      | 178,442            |
| <b>Mean Ancestry:</b> |            |                        |            |                    |
| BA                    | I0047      | Unetice_EBA            | 3,377      | 295,581            |
| BA                    | I0049      | Corded_Ware_Germany    | 2,314      | 190,443            |
| BA                    | I0059      | BenzigerodeHeimburg_LN | 3,124      | 273,321            |
| BA                    | I0099      | Halberstadt_LBA        | 3,081      | 339,040            |
| BA                    | I0103      | Corded_Ware_Germany    | 4,273      | 358,176            |
| BA                    | I0104      | Corded_Ware_Germany    | 3,223      | 336,630            |
| BA                    | I0115      | Unetice_EBA            | 1,513      | 130,840            |
| BA                    | I0116      | Unetice_EBA            | 1,353      | 229,560            |
| BA                    | I0117      | Unetice_EBA            | 3,520      | 307,312            |
| BA                    | I0118      | Alberstedt_LN          | 4,205      | 364,382            |
| BA                    | I0164      | Unetice_EBA            | 3,278      | 301,603            |
| BA                    | I0803      | Unetice_EBA            | 1,241      | 84,086             |
| BA                    | I1532      | Corded_Ware_Germany    | 1,248      | 171,544            |
| BA                    | RISE00     | Corded_Ware_Estonia    | 2,538      | 221,453            |
| BA                    | RISE150    | Unetice_EBA            | 2,383      | 248,413            |
| BA                    | RISE577    | Unetice_EBA            | 2,857      | 254,460            |
| <b>Mean Ancestry:</b> |            |                        |            |                    |

**Table S1: Sample descriptions for admixed populations.** Archeological label follows Mathieson et al. (2015). For CE individuals, the archeological label in the archeological culture from Mathieson et al. (2015). For BA individuals, all individuals are ‘Central\_LNBA;’ therefore, we use the more detailed information from Lazaridis et al. (2016)

| Admixed Population | Individual            | Ancestry, X chromosome | Ancestry, Autosomes (All SNPs) | Ancestry, Autosomes (Median of 100 SNP sets) |
|--------------------|-----------------------|------------------------|--------------------------------|----------------------------------------------|
| CE                 | I0172                 | 0.74                   | 0.80                           | 0.78                                         |
| CE                 | I0560                 | 0.70                   | 0.74                           | 0.73                                         |
| CE                 | I1497                 | 1.00                   | 0.85                           | 0.83                                         |
| CE                 | I1495                 | 0.78                   | 0.89                           | 0.89                                         |
| CE                 | I1496                 | 1.00                   | 1.00                           | 1.00                                         |
| CE                 | I1498                 | 0.79                   | 0.89                           | 0.89                                         |
| CE                 | I1499                 | 0.95                   | 0.86                           | 0.85                                         |
| CE                 | I1500                 | 0.90                   | 0.95                           | 0.94                                         |
| CE                 | I1505                 | 0.92                   | 0.91                           | 0.91                                         |
| CE                 | I1506                 | 0.91                   | 0.91                           | 0.90                                         |
| CE                 | I1508                 | 1.00                   | 1.00                           | 1.00                                         |
| CE                 | Iceman                | 0.73                   | 0.82                           | 0.83                                         |
| CE                 | I0022                 | 1.00                   | 1.00                           | 0.98                                         |
| CE                 | I0025                 | 1.00                   | 0.94                           | 0.93                                         |
| CE                 | I0026                 | 0.92                   | 0.99                           | 1.00                                         |
| CE                 | I0046                 | 0.99                   | 0.98                           | 0.94                                         |
| CE                 | I0054                 | 1.00                   | 0.95                           | 0.96                                         |
| CE                 | I0100                 | 0.73                   | 0.96                           | 0.98                                         |
| CE                 | I0659                 | 1.00                   | 0.99                           | 1.00                                         |
| CE                 | I1550                 | 1.00                   | 0.96                           | 0.93                                         |
|                    | <b>Mean Ancestry:</b> | <b>0.903</b>           | <b>0.919</b>                   | <b>0.913</b>                                 |
| BA                 | I0047                 | 0.51                   | 0.55                           | 0.511                                        |
| BA                 | I0049                 | 0.33                   | 1.00                           | 1.000                                        |
| BA                 | I0059                 | 0.43                   | 0.54                           | 0.519                                        |
| BA                 | I0099                 | 0.19                   | 0.54                           | 0.479                                        |
| BA                 | I0103                 | 1.00                   | 1.00                           | 0.732                                        |
| BA                 | I0104                 | 0.25                   | 1.00                           | 0.789                                        |
| BA                 | I0115                 | 0.03                   | 0.66                           | 0.599                                        |
| BA                 | I0116                 | 0.40                   | 0.63                           | 0.589                                        |
| BA                 | I0117                 | 0.05                   | 0.56                           | 0.516                                        |
| BA                 | I0118                 | 0.48                   | 0.54                           | 0.493                                        |
| BA                 | I0164                 | 0.32                   | 0.62                           | 0.561                                        |
| BA                 | I0803                 | 0.78                   | 0.68                           | 0.573                                        |
| BA                 | I1532                 | 0.00                   | 1.00                           | 0.625                                        |
| BA                 | RISE00                | 0.95                   | 0.68                           | 0.642                                        |
| BA                 | RISE150               | 0.12                   | 1.00                           | 0.674                                        |
| BA                 | RISE577               | 0.01                   | 0.61                           | 0.582                                        |
|                    | <b>Mean Ancestry:</b> | <b>0.366</b>           | <b>0.726</b>                   | <b>0.618</b>                                 |

**Table S2: Individual ancestry in admixed populations.** Ancestry is estimated in ADMIXTURE v1.3 using supervised clustering, results presented are the component clustering with the migrating population. For the Neolithic Transition with admixed CE individuals, that is AF ancestry, for Pontic Steppe migration with admixed BA individuals, that is SP ancestry.

| Population | Individual   | # SNPs (X)   | # SNPs (Autosomes) |
|------------|--------------|--------------|--------------------|
| HG         | I0011        | 2,597        | 238,300            |
| HG         | I0012        | 2,248        | 288,233            |
| HG         | I0013        | 294          | 114,115            |
| HG         | I0014        | 2,847        | 277,370            |
| HG         | I0015        | 1,394        | 224,569            |
| HG         | I0017        | 2,826        | 326,861            |
| HG         | I0585        | 3,315        | 331,453            |
| HG         | I1507        | 2,881        | 304,651            |
| HG         | Loschbour    | 4,483        | 370,431            |
| AF         | I0707        | 3,928        | 347,728            |
| AF         | I0708        | 3,120        | 339,272            |
| AF         | I0709        | 3,196        | 344,000            |
| <i>AF</i>  | <i>I0723</i> | <i>1,069</i> | <i>158,218</i>     |
| <i>AF</i>  | <i>I0724</i> | <i>101</i>   | <i>20,982</i>      |
| <i>AF</i>  | <i>I0726</i> | <i>910</i>   | <i>84,012</i>      |
| <i>AF</i>  | <i>I0727</i> | <i>95</i>    | <i>16,374</i>      |
| AF         | I0736        | 3,090        | 293,649            |
| AF         | I0744        | 2,665        | 316,049            |
| AF         | I0745        | 3,290        | 346,243            |
| AF         | I0746        | 3,310        | 347,428            |
| AF         | I1096        | 2,658        | 292,505            |
| AF         | I1097        | 2,532        | 289,766            |
| AF         | I1098        | 3,401        | 302,251            |
| AF         | I1099        | 1,579        | 215,557            |
| AF         | I1100        | 1,338        | 121,755            |
| AF         | I1101        | 2,176        | 259,865            |
| AF         | I1102        | 1,087        | 168,149            |
| AF         | I1103        | 1,900        | 239,704            |
| AF         | I1579        | 3,525        | 306,814            |
| AF         | I1580        | 3,853        | 332,503            |
| AF         | I1581        | 3,578        | 308,641            |
| AF         | I1583        | 3,665        | 349,463            |
| AF         | I1585        | 3,621        | 309,674            |
| SP         | I0231        | 3,695        | 361,283            |
| SP         | I0357        | 2,298        | 189,734            |
| SP         | I0370        | 2,047        | 254,721            |
| SP         | I0429        | 1,600        | 224,264            |
| SP         | I0438        | 1,353        | 206,462            |
| <i>SP</i>  | <i>I0439</i> | <i>600</i>   | <i>96,300</i>      |
| SP         | I0441        | 328          | 37,237             |
| SP         | I0443        | 3,344        | 347,381            |
| SP         | I0444        | 1,345        | 197,552            |

**Table S3: Source population individuals.** Ancestry is estimated in *Admixture* using supervised clustering, results presented are the component clustering with the migrating population. Individuals in italicized rows were not included in main text analyses (Materials & Methods). HG—Hunter gatherer, AF—Anatolian Farmer, SP—Pontic-Caspian Steppe.

| Admixed Population | Individual            | Ancestry, Admixture Unsupervised | Ancestry, Structure Unsupervised | Ancestry, Structure Supervised |
|--------------------|-----------------------|----------------------------------|----------------------------------|--------------------------------|
| CE                 | I0172                 | 0.83                             | 0.83                             | 0.75                           |
| CE                 | I0560                 | 0.77                             | 0.86                             | 0.76                           |
| CE                 | I1497                 | 0.86                             | 0.89                             | 0.78                           |
| CE                 | I1495                 | 0.90                             | 0.86                             | 0.77                           |
| CE                 | I1496                 | 1.00                             | 1.00                             | 0.83                           |
| CE                 | I1498                 | 0.90                             | 0.96                             | 0.79                           |
| CE                 | I1499                 | 0.87                             | 0.86                             | 0.78                           |
| CE                 | I1500                 | 0.95                             | 1.00                             | 0.83                           |
| CE                 | I1505                 | 0.92                             | 0.93                             | 0.79                           |
| CE                 | I1506                 | 0.92                             | 0.91                             | 0.79                           |
| CE                 | I1508                 | 1.00                             | 1.00                             | 0.85                           |
| CE                 | Iceman                | 0.85                             | 0.85                             | 0.76                           |
| CE                 | I0022                 | 1.00                             | 1.00                             | 0.84                           |
| CE                 | I0025                 | 0.95                             | 0.99                             | 0.80                           |
| CE                 | I0026                 | 0.99                             | 1.00                             | 0.82                           |
| CE                 | I0046                 | 0.98                             | 0.98                             | 0.80                           |
| CE                 | I0054                 | 0.95                             | 0.95                             | 0.79                           |
| CE                 | I0100                 | 0.97                             | 1.00                             | 0.82                           |
| CE                 | I0659                 | 0.99                             | 1.00                             | 0.82                           |
| CE                 | I1550                 | 0.96                             | 0.96                             | 0.80                           |
|                    | <b>Mean Ancestry:</b> | <b>0.928</b>                     | <b>0.941</b>                     | <b>0.798</b>                   |
| BA                 | I0047                 | 0.59                             | 0.65                             | 0.24                           |
| BA                 | I0049                 | 1.00                             | 0.99                             | 0.26                           |
| BA                 | I0059                 | 0.59                             | 0.58                             | 0.23                           |
| BA                 | I0099                 | 0.59                             | 0.67                             | 0.23                           |
| BA                 | I0103                 | 1.00                             | 0.92                             | 0.27                           |
| BA                 | I0104                 | 1.00                             | 0.79                             | 0.28                           |
| BA                 | I0115                 | 0.70                             | 0.69                             | 0.26                           |
| BA                 | I0116                 | 0.68                             | 0.77                             | 0.22                           |
| BA                 | I0117                 | 0.61                             | 0.63                             | 0.22                           |
| BA                 | I0118                 | 0.58                             | 0.68                             | 0.22                           |
| BA                 | I0164                 | 0.67                             | 0.71                             | 0.25                           |
| BA                 | I0803                 | 0.75                             | 0.69                             | 0.26                           |
| BA                 | I1532                 | 1.00                             | 0.81                             | 0.24                           |
| BA                 | RISE00                | 0.75                             | 0.93                             | 0.24                           |
| BA                 | RISE150               | 1.00                             | 0.83                             | 0.25                           |
| BA                 | RISE577               | 0.67                             | 0.80                             | 0.25                           |
|                    | <b>Mean Ancestry:</b> | <b>0.761</b>                     | <b>0.759</b>                     | <b>0.244</b>                   |

**Table S4: Replication of individual autosomal ancestry in admixed populations.** Ancestry is estimated in *Admixture* using unsupervised clustering, and in *Structure* using both supervised and unsupervised clustering. Results presented are the component clustering with the migrating population. For the Neolithic Transition with admixed CE individuals, that is AF ancestry, for Pontic Steppe migration with admixed BA individuals, that is SP ancestry. Results are the mean by individual of ten independent runs. We use ten different subsamples of 25,000 SNPs.

| Admixed Population | Individual            | Ancestry, Admixture Unsupervised | Ancestry, Structure Unsupervised | Ancestry, Structure Supervised |
|--------------------|-----------------------|----------------------------------|----------------------------------|--------------------------------|
| CE                 | I0172                 | 0.72                             | 0.86                             | 0.72                           |
| CE                 | I0560                 | 0.72                             | 0.85                             | 0.71                           |
| CE                 | I1497                 | 1.00                             | 1.00                             | 0.80                           |
| CE                 | I1495                 | 0.73                             | 0.93                             | 0.74                           |
| CE                 | I1496                 | 1.00                             | 1.00                             | 0.85                           |
| CE                 | I1498                 | 0.78                             | 0.83                             | 0.72                           |
| CE                 | I1499                 | 0.91                             | 0.98                             | 0.80                           |
| CE                 | I1500                 | 0.90                             | 0.94                             | 0.74                           |
| CE                 | I1505                 | 0.90                             | 0.94                             | 0.76                           |
| CE                 | I1506                 | 0.89                             | 0.97                             | 0.78                           |
| CE                 | I1508                 | 1.00                             | 1.00                             | 0.85                           |
| CE                 | Iceman                | 0.73                             | 0.77                             | 0.70                           |
| CE                 | I0022                 | 1.00                             | 1.00                             | 0.86                           |
| CE                 | I0025                 | 0.99                             | 1.00                             | 0.78                           |
| CE                 | I0026                 | 0.91                             | 0.97                             | 0.75                           |
| CE                 | I0046                 | 0.98                             | 1.00                             | 0.77                           |
| CE                 | I0054                 | 1.00                             | 1.00                             | 0.79                           |
| CE                 | I0100                 | 0.72                             | 0.73                             | 0.70                           |
| CE                 | I0659                 | 1.00                             | 1.00                             | 0.81                           |
| CE                 | I1550                 | 1.00                             | 1.00                             | 0.80                           |
|                    | <b>Mean Ancestry:</b> | <b>0.894</b>                     | <b>0.937</b>                     | <b>0.772</b>                   |
| BA                 | I0047                 | -                                | 0.46                             | 0.21                           |
| BA                 | I0049                 | -                                | 0.46                             | 0.20                           |
| BA                 | I0059                 | -                                | 0.52                             | 0.23                           |
| BA                 | I0099                 | -                                | 0.18                             | 0.16                           |
| BA                 | I0103                 | -                                | 0.91                             | 0.26                           |
| BA                 | I0104                 | -                                | 0.28                             | 0.18                           |
| BA                 | I0115                 | -                                | 0.04                             | 0.15                           |
| BA                 | I0116                 | -                                | 0.63                             | 0.20                           |
| BA                 | I0117                 | -                                | 0.15                             | 0.15                           |
| BA                 | I0118                 | -                                | 0.53                             | 0.21                           |
| BA                 | I0164                 | -                                | 0.35                             | 0.19                           |
| BA                 | I0803                 | -                                | 0.66                             | 0.22                           |
| BA                 | I1532                 | -                                | 0.00                             | 0.12                           |
| BA                 | RISE00                | -                                | 0.72                             | 0.20                           |
| BA                 | RISE150               | -                                | 0.15                             | 0.19                           |
| BA                 | RISE577               | -                                | 0.01                             | 0.16                           |
|                    | <b>Mean Ancestry:</b> | <b>NA</b>                        | <b>0.378</b>                     | <b>0.189</b>                   |

**Table S5: Replication of individual X-chromosomal ancestry in admixed populations.**

Ancestry is estimated in *Admixture* using unsupervised clustering, and in *Structure* using both supervised and unsupervised clustering. Results presented are the component clustering with the migrating population. For the Neolithic Transition with admixed CE individuals, that is AF ancestry. For the Pontic Steppe migration with admixed BA individuals, that is SP ancestry. Results are the mean by individual of ten independent runs.

| <b>Individual</b>     | <b>Ancestry, X chromosome</b> | <b>Ancestry, Autosomes (All SNPs)</b> |
|-----------------------|-------------------------------|---------------------------------------|
| I0172                 | 0.72                          | 0.63                                  |
| I0560                 | 1.00                          | 0.81                                  |
| I1497                 | 1.00                          | 0.83                                  |
| I1495                 | 0.99                          | 0.88                                  |
| I1496                 | 1.00                          | 1.00                                  |
| I1498                 | 0.89                          | 0.94                                  |
| I1499                 | 1.00                          | 0.84                                  |
| I1500                 | 1.00                          | 0.94                                  |
| I1505                 | 1.00                          | 0.93                                  |
| I1506                 | 1.00                          | 0.92                                  |
| I1508                 | 1.00                          | 1.00                                  |
| I0022                 | 1.00                          | 1.00                                  |
| I0025                 | 1.00                          | 0.91                                  |
| I0026                 | 1.00                          | 0.90                                  |
| I0046                 | 0.99                          | 0.89                                  |
| I0054                 | 1.00                          | 0.87                                  |
| I0100                 | 0.80                          | 0.83                                  |
| I0659                 | 1.00                          | 1.00                                  |
| I1550                 | 1.00                          | 1.00                                  |
| <b>Mean Ancestry:</b> | <b>0.968</b>                  | <b>0.901</b>                          |

**Table S6: Ancestry estimates using alternative farming source individuals for the Neolithic migration.** Ancestry is estimated in ADMIXTURE v1.3 using supervised clustering, results presented are the component clustering with the migrating Near Eastern population. Lazaridis does not include Iceman.

| <b>Individual</b>     | <b>Ancestry, X chromosome</b> | <b>Ancestry, Autosomes (All SNPs)</b> |
|-----------------------|-------------------------------|---------------------------------------|
| I0108                 | 0.34                          | 0.50                                  |
| I0111                 | 0.11                          | 0.59                                  |
| I0112                 | 0.42                          | 0.55                                  |
| I0113                 | 0.16                          | 0.55                                  |
| I1549                 | 0.18                          | 0.61                                  |
| RISE569               | 0.50                          | 0.56                                  |
| <b>Mean Ancestry:</b> | <b>0.284</b>                  | <b>0.560</b>                          |

**Table S7: Individual ancestry in admixed Bell Beaker individuals.** Ancestry is estimated in ADMIXTURE v1.3 using supervised clustering, results presented are the component clustering with the migrating steppe population.
